# Supplementary material for: A new approach to superior optical limiting materials—planar ‘open’ heterothiometallic clusters
Source: Royal Society of Chemistry journal article supplement (doi:10.1039/b100395j), 2001-01-01
Supplement: b100395j.doc [file b100395j.doc]

A new approach to superior optical limiting materials - planar 'open' heterothiometallic clusters

Chi Zhang,a,b,c,* Yinglin Song,a,* B. M. Fung,b Ziling Xue,d and Xinquan Xinc,*

a  *Department of Applied Physics, Harbin Institute of Technology, Harbin 150001, P. R. China*

b *Department of Chemistry and Biochemistry, University of Oklahoma, Norman, Oklahoma 73019, U.S.A.*

c *Department of Chemistry and State Key Laboratory of Coordination Chemistry, Nanjing University, Nanjing 210093, P. R. China*

d *Department of Chemistry, The University of Tennessee, Knoxville, Tennessee 37996-1600, U.S.A.*

# Supplementary Information

1. Preparation and Characterization of the Planar 'Open' Heterothiometallic Clusters

2. Molecular Structures of Clusters

3. The Pump-Probe Experimental Setup and Results

4. The Ground-State Absorption Spectra of Clusters

5. The Figures of Z-Scan Experiments under Open-Aperture Configuration of Clusters

6. The Figures of the Energy-Dependent Transmittance of Clusters

# 1. Preparation and Characterization of the Planar Heterothiometallic Clusters

# All reactions and manipulations were conducted using standard Schlenk techniques under an atmosphere of nitrogen. (R4N)2MS4 (M = Mo, W; R = H, Et) were prepared according to literature.S1 2, and 5-6 were synthesized by the improved method - ligand-redistribution reaction as following. Organic solvents were dried according to standard purification procedures and distilled prior to use.S2 Other chemicals were generally used as received.

**Preparation of [WS4Cu4I2(py)6] (1).** CuI (2 mmol, 0.38 g) was added to 15 mL of py, and the mixture was stirred for 5 min at room temperature. CuI was dissolved, and the solution turned from colorless to light yellow. (NH4)2WS4 (0.5 mmol, 0.174 g) was then added. The color of the solution immediately turned to deep-red. After stirring for 10 min, the solution was filtered to afford a deep-red filtrate. Red crystals of **1** (0.60 g, 92%) were obtained by layering the filtrate with i-PrOH. Anal. Calcd. for C30H30N6I2WCu4S4: C, 27.83; H, 2.34; N, 6.49. Found: C, 27.66; H, 2.51; N, 6.31. IR (KBr pellets, cm-1): 1596.7 (vs), 1481.6 (s), 1440.9 (vs), 1210.6 (s), 1066.7 (s), 1036.5 (s), 1008.9 (s), 750.6 (vs), 695.6 (vs), 626.1 (s), 436.8 (vs) [(W-3-S)].

**Preparation of [MoS4Cu4I2(py)6] (2).**  A procedure similar to preparation of **1** was used. (NH4)2MoS4 (0.5 mmol, 0.130 g) instead of (NH4)2WS4 was used to give black-red crystals of **2** (0.57 g, 94%). Anal. Calcd. for C30H30N6I2Cu4S4Mo: C, 29.83; H, 2.49; N, 6.76%. Found: C, 29.71; H, 2.33; N, 6.75%. IR (KBr pellets, cm-1): 1597.0(vs), 1482.1(s), 1441.1(vs), 1214.6(s), 1066.3(s), 1036.1(s), 1009.0(s), 751.2(vs), 696.2(vs), 626.3(s), 447.1(vs). [(Mo-3-S)].

**Preparation of [WS4Cu4Br2(py)6] (3).** CuBr (2 mmol, 0.287 g) was added to 15 mL of py, and the mixture was stirred for 5 min at room temperature. CuBr was dissolved, and the color of the solution changed from colorless to light yellow. (NH4)2WS4 (0.5 mmol, 0.174 g) was then added. The solution immediately turned to deep-red. After stirring for 10 min, the solution was filtered to afford a deep-red filtrate. Red crystals of **3** (0.57 g, 95%) were obtained by layering the filtrate with i-PrOH. Anal. Calcd. for C30H30N6Br2WCu4S4: C, 29.83; H, 2.49; N, 6.96. Found: C, 29.71; H, 2.33; N, 6.85. IR (KBr pellets, cm-1): 1596.8 (vs), 1481.5 (s), 1441.1 (vs), 1214.1 (s), 1066.0 (s), 1036.0 (s), 1008.6 (s), 750.9 (vs), 696.1 (vs), 625.5 (s), 437.1 (vs) [(W-3-S)].

**Preparation of [MoS4Cu4Br2(py)6] (4).**  A procedure similar to preparation of **3** was used. (NH4)2MoS4 (0.5 mmol, 0.130 g) instead of (NH4)2WS4 was used to give black-red crystals of **4** (0.51 g, 92%). Anal. Calcd. for C30H30N6Br2MoCu4S4: C, 32.37; H, 2.70; N, 7.55. Found: C, 32.45; H, 2.61; N, 7.31. IR (KBr pellets, cm-1): 1596.7 (vs), 1481.5 (s), 1441.1 (vs), 1214.0 (s), 1065.9 (s), 1036.0 (s), 1008.6 (s), 751.1 (vs), 696.2 (vs), 625.4 (s), 447.0 (vs) [(Mo-3-S)].

**Preparation of [WS4Cu4Cl2(py)6] (5).**  A procedure similar to preparation of **1** was used. CuCl (2 mmol, 0.198 g) instead of CuI was used to give red crystals of **5** (0.51g, 92%). Anal. Calcd. for C30H30N6Cl2WCu4S4: C, 32.41; H, 2.73; N, 7.56. Found: C, 32.46; H, 2.65; N, 7.31. IR (KBr pellets, cm-1): 1596.8 (vs), 1481.3 (s), 1441.2 (vs), 1214.1 (s), 1065.9 (s), 1036.2 (s), 1008.5 (s), 751.0 (vs), 696.3 (vs), 625.2 (s), 437.2 (vs) [(W-3-S)].

**Preparation of [MoS4Cu4Cl2(py)6] (6).**  A procedure similar to preparation of **5** was used. (NH4)2MoS4 (0.5 mmol, 0.130 g) instead of (NH4)2WS4 was used to give black-red crystals of **6** (0.46 g, 90%). Anal. Calcd. for C30H30N6Cl2MoCu4S4: C, 35.19; H, 2.96; N, 8.21. Found: C, 35.24; H, 2.91; N, 8.23. IR (KBr pellets, cm-1): 1596.6 (vs), 1481.5 (s), 1440.8 (vs), 1214.1 (s), 1065.7 (s), 1036.1 (s), 1008.7 (s), 751.3 (vs), 696.2 (vs), 625.5 (s), 447.1 (vs) [(Mo-3-S)].

**References (for Supporting Information)**

(S1). McDonald, J. W.; Frieson, G. D.; Rosenhein, L. D.; Newton, W. E. *Inorg. Chim. Acta*, 1983, **72**, 205.

(S2). Perrin, D. D.; Armarego, W. L. F, *Purification of Laboratory Chemicals*, 3rd ed.; Pergamon Press: Oxford, 1988.

**2. Molecular Structures of Clusters 1, 3 and 4**

**Figure S1.** ORTEP drawing of [WS4Cu4I2(py)6] **1**.

**Figure S2.** ORTEP drawing of [WS4Cu4Br2(py)6] **3**.

**Figure S3.** ORTEP drawing of [MoS4Cu4Br2(py)6] **4**.

**3. The Pump-Probe Experimental Setup and Results**

The pump-probe measurements were conducted on the current clusters to further investigate the physical origin of their optical nonlinearities. A frequency-doubled Nd:YAG pulse laser with a 532 nm wavelength and 8 ns pulse width was used as a pump beam (pulse energy of 300 J). A CW He-Ne laser with wavelength of 632.8 nm was used as a probe beam (optical power of 20 mW). Both collinearly passed through a sample in DMF solution with a thickness L = 0.5 cm. The probe beam passed through a stopping filter at 532 nm, and went into a photometer. When the probe beam (632.8 nm) passed through the photometer, probe intensity is measured as a function of time with rapid multiplier phototube connected to a BOXCAR. The change of the probe beam intensity versus the delay time was recorded after the pump beam. Experimental curves are shown in Figures S4, S5. The optical nonlinearities of the clusters, fullerene-C60 were studied by using the same experiment setup, respectively. Fullerene-C60 exhibits typically an excited-state nonlinearity. Figures S4, S5 also show the comparison of pump-probe results for clusters and fullerene-C60. Rapid decreasing of the transmittances of clustersand fullerene-C60 indicate that clusters have rapid optical response, which is similar to fullerene-C60 and different from the optical nonlinearity of CBS, while the later always has a slower response due to a long thermal lifetime. Therefore, we can reasonably conclude that the origins of the nonlinearity of the cluster are similar to fullerene-C60 and these experiments demonstrate that the physical origin of the OL abilities of **1**-**8** mainly come from excited-state absorption processes.

**Figure S4.** The pump-probe experiment of **1**.

**Figure S5.** The pump-probe experiment of **3**.

**4. The Ground-State Absorption Spectra of Clusters**

**Figure S6.** The ground-state absorption spectra of **1** and **2**.

**Figure S7.** The ground-state absorption spectra of **3** and **4**.

5. The Z-Scan Experiments under Open-Aperture Configuration of Clusters

**Figure S8.** The Z-scan experiment under an open-aperture configuration of **1**.

**Figure S9.** The Z-scan experiment under an open-aperture configuration of **2**.

**Figure S10.** The Z-scan experiment under an open-aperture configuration of **3**.

**Figure S11.** The Z-scan experiment under an open-aperture configuration of **4**.

**Figure S12.** The Z-scan experiment under an open-aperture configuration of **5**.

**Figure S13.** The Z-scan experiment under an open-aperture configuration of **6**.

**6. The Figures of the Energy-Dependent Transmittance of Clusters**

**Figure S14.** The energy-dependent transmittance of **1** and **2**.

**Figure S15.** The energy-dependent transmittance of **3** and **4**.

**Figure S16.** The energy-dependent transmittance of **5** and **6**.

**Figure S17.** The energy-dependent transmittance of **7** and **8**.
